37. Mazze RI, Wilson AI, Rice SA, Baden JM: Fetal development in mice exposed to isoflurane. *Teratology* 1985; 32:339-45
38. Wunsch H, Kress JP: A new era for sedation in ICU patients. *JAMA* 2009; 301:542-4
39. Brook AD, Ahrens TS, Schaiff R, Prentice D, Sherman G, Shannon W, Kollef MH: Effect of a nursing-implemented sedation protocol on the duration of mechanical ventilation. *Crit Care Med* 1999; 27:2609-15
40. Kress JP, Pohlman AS, O'Connor MF, Hall JB: Daily interruption of sedative infusions in critically ill patients undergoing mechanical ventilation. *N Engl J Med* 2000; 342:1471-7
41. Girard TD, Kress JP, Fuchs BD, Thomason JW, Schweickert WD, Pun BT, Taichman DB, Dunn JG, Pohlman AS, Kinniry PA, Jackson JC, Canonico AE, Light RW, Shintani AK, Thompson JL, Gordon SM, Hall JB, Dittus RS, Bernard GR, Ely EW: Efficacy and safety of a paired sedation and ventilator weaning protocol for mechanically ventilated patients in intensive care (Awakening and Breathing Controlled trial): A randomised controlled trial. *Lancet* 2008; 371:126-34
42. Payen JF, Bosson JL, Chanques G, Mantz J, Labarere J, DOLOREA Investigators: Pain assessment is associated with decreased duration of mechanical ventilation in the intensive care unit: A post Hoc analysis of the DOLOREA study. *ANESTHESIOLOGY* 2009; 111:1308-16
43. Ariyama J, Hayashida M, Shibata K, Sugimoto Y, Imanishi H, O-oi Y, Kitamura A: Risk factors for the development of reversible psychomotor dysfunction following prolonged isoflurane inhalation in the general intensive care unit. *J Clin Anesth* 2009; 21:567-73
44. Jackson JC, Girard TD, Gordon SM, Thompson JL, Shintani AK, Thomason JW, Pun BT, Canonico AE, Dunn JG, Bernard GR, Dittus RS, Ely EW: Long-term cognitive and psychological outcomes in the awakening and breathing controlled trial. *Am J Respir Crit Care Med* 2010; 182:183-91
45. Kress JP, Gehlbach B, Lacy M, Pliskin N, Pohlman AS, Hall JB: The long-term psychological effects of daily sedative interruption on critically ill patients. *Am J Respir Crit Care Med* 2003; 168:1457-61

## ANESTHESIOLOGY REFLECTIONS

### A Taste of Sim's *Heritage of Anesthesia*

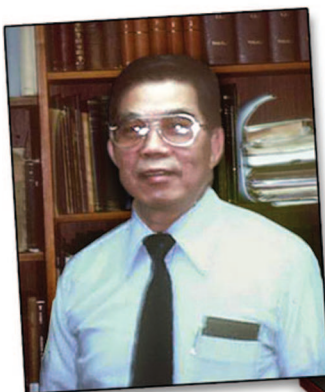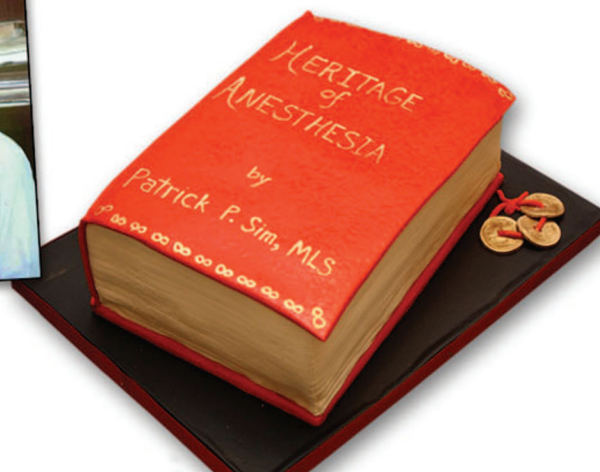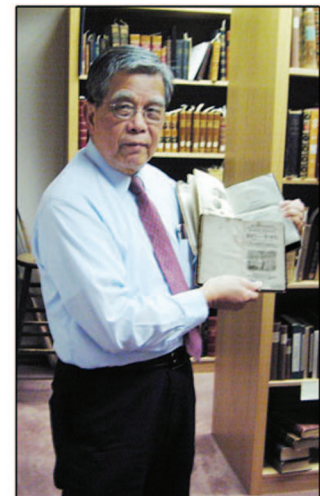

From the very beginning of his library career back in 1971, Patrick Pui-Kam Sim, M.L.S. (1939–2010), was enchanted by antiquarian books housed at the American Society of Anesthesiologists' Wood Library-Museum of Anesthesiology. Photographed on the left (in 1991) and on the right (in 2004) by the curator, "Pat" Sim relished his every moment in the K. Garth Huston, Sr. Rare Book Room. Leafing through the old tomes, Pat resolved that, one day, he would annotate a bibliography with essential information gleaned from each revered volume. Before terminal illness claimed the life of the Paul M. Wood Distinguished Librarian Emeritus, Patrick Sim would taste a cake decorated by the curator's wife with the title Pat had planned for his masterwork, *Heritage of Anesthesia*, a publication that he would never live to see. . . . (Copyright © the American Society of Anesthesiologists, Inc. This image appears in color in the *Anesthesiology Reflections* online collection available at [www.anesthesiology.org](http://www.anesthesiology.org).)

George S. Bause, M.D., M.P.H., Honorary Curator, ASA's Wood Library-Museum of Anesthesiology, Park Ridge, Illinois, and Clinical Associate Professor, Case Western Reserve University, Cleveland, Ohio. [UJYC@aol.com](mailto:UJYC@aol.com).
